# Supplementary material for: Inferring individual sexual action dispositions from egocentric network data on dyadic sexual outcomes
Source: PLOS journal article supplement (doi:10.1371/journal.pone.0207116), 2018-11-12
Supplement: S5 (10.1371/journal.pone.0207116.s005) [file journal.pone.0207116.s005]

Table S2: **Anal sex disposition results assuming females and males draw their disposition from different distributions**

| Model                       | LogL   | AIC    | $\hat{p}_A^M$ | $\hat{p}_A^W$ | $\hat{p}_N^M$ | $\hat{p}_N^W$ | $\hat{p}_I^M$ | $\hat{p}_I^W$ | $\hat{\epsilon}_{NA}$ | $\hat{\epsilon}_{NA}^{MW}$ | $\hat{\epsilon}_{AN}^{MW}$ |
|-----------------------------|--------|--------|---------------|---------------|---------------|---------------|---------------|---------------|-----------------------|----------------------------|----------------------------|
| pro-con                     | -743.2 | 1490.4 | 0.464         | 0.455         | 0.536         | 0.545         | -             | -             | -                     | -                          | -                          |
| pro-con $\epsilon_{NA}$     | -671.4 | 1348.8 | 0.125         | 0.153         | 0.875         | 0.847         | -             | -             | 0.908                 | -                          | -                          |
| pro-con $\epsilon^{MW}$     | -671.3 | 1350.6 | 0.130         | 0.150         | 0.870         | 0.850         | -             | -             | -                     | 0.919                      | 0.885                      |
| pro-con-ind                 | -717.0 | 1442.0 | 0             | 0.171         | 0.331         | 0.468         | 0.669         | 0.361         | -                     | -                          | -                          |
| pro-con-ind $\epsilon_{NA}$ | -668.6 | 1347.2 | 0.105         | 0.119         | 0.296         | 0.773         | 0.599         | 0.108         | 0.888                 | -                          | -                          |
| pro-con-ind $\epsilon^{MW}$ | -668.6 | 1349.2 | 0.105         | 0.119         | 0.297         | 0.774         | 0.598         | 0.107         | -                     | 0.889                      | 0.888                      |

Maximum likelihood, AIC and estimates for each model when we assume females and males draw their disposition from different distributions.  $A$  stands for pro anal sex,  $N$  stands for against anal sex and  $I$  stands for neutral. For example,  $\hat{p}_A^M$  is the proportion men who want to have anal sex.  $\hat{\epsilon}_{NA}$  is the probability for anal sex when a person who wants to have anal sex meets a person who does not.  $\hat{\epsilon}_{NA}^{MW}$  is the probability for anal sex when a male who does not want to have anal sex meets a female who does.  $\hat{\epsilon}_{AN}^{MW}$  is the probability for anal sex when a male who does want to have anal sex meets a female who does.
